# Supplementary material
Source: Springer Nature journal article supplement (https://www.springermedizin.de/resource/supplementary/12960_2012_286_MOESM2_ESM.pdf/9569766)
Supplement: MOESM2 [file 9569766]

Inflow: Joiners

- newly qualified
- international
- returners
- etc

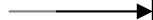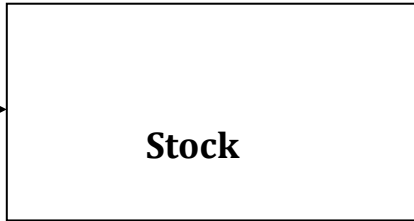

**Stock**

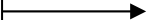

Outflow- Leavers

- retirement
- international
- non nursing
- etc
